1  
2  
3  
4  
5  
6  
7  
8  
9  
10  
11  
12  
13  
14  
15  
16  
17  
18  
19  
20  
21  
22

## **Nature and effective range of non-cell autonomous activator and inhibitor peptides specifying plant stomatal patterning**

Scott Zeng<sup>1</sup>, Emily K. W. Lo<sup>2\*</sup>, Bryna J. Hazelton<sup>1,3</sup>, Miguel F. Morales<sup>1</sup>, Keiko U. Torii<sup>2,4,5†</sup>

<sup>1</sup> Department of Physics, University of Washington, Seattle, WA 98195 USA

<sup>2</sup> Department of Biology, University of Washington, Seattle, WA 98195 USA

<sup>3</sup> eScience Institute, University of Washington, Seattle, WA 98195 USA

<sup>4</sup> Howard Hughes Medical Institute, University of Texas at Austin, Austin, TX 78712 USA

<sup>5</sup> Department of Molecular Biosciences, University of Texas at Austin, Austin, TX 78712 USA

\*Present address: Center for Epigenetics, John Hopkins University School of Medicine, Baltimore, MD 21205

† Author for correspondence ([ktorii@utexas.edu](mailto:ktorii@utexas.edu))

### **Summary Statement**

Non-cell autonomous effects of activator and inhibitor peptides on 2-D spatial patterning of stomata were quantitatively characterized using chimeric sectors and a SPACE computational pipeline.

23  
24  
25  
26  
27  
28  
29  
30  
31  
32  
33  
34  
35  
36  
37  
38  
39  
40  
41  
42

## **Summary**

**Stomata are epidermal valves that facilitate gas exchange between plants and their environment. Stomatal patterning is regulated by EPIDERMAL PATTERNING FACTOR (EPF)-family of secreted peptides: EPF1 enforcing stomatal spacing, whereas EPF-LIKE9, also known as Stomagen, promoting stomatal development. It remains unknown, however, how far these signaling peptides act. Utilizing Cre-Lox recombination-based mosaic sectors that overexpress either EPF1 or Stomagen in Arabidopsis cotyledons, we reveal a range within the epidermis and across the cell layers in which these peptides influence patterns. To quantitatively determine their effective ranges, we developed a computational pipeline, SPACE (Stomata Patterning AutoCorrelation on Epidermis), that describes probabilistic two-dimensional stomatal distributions based upon spatial autocorrelation statistics used in Astrophysics. The SPACE analysis shows that, whereas both peptides act locally, the inhibitor, EPF1, exerts longer-range effects than the activator, Stomagen. Furthermore, local perturbation of stomatal development has little influence on global two-dimensional stomatal patterning. Our findings conclusively demonstrate the nature and extent of EPF peptides as non-cell autonomous local signals and provides a means to quantitatively characterize complex spatial patterns in development.**

## 43 **Introduction**

44  
45 During the development of multicellular organisms, distinct cell types emerge with specific roles and  
46 functions. Cell-to-cell communication of positional cues and spatial information is essential to  
47 coordinating the transition from a tissue of uniformly undifferentiated cells into a robust pattern of  
48 specialized identities. For plant systems, the presence of the cell wall prevents direct cell-to-cell  
49 contact or cell mobility, thereby excluding many of the mechanisms for pattern formation studied in  
50 animals, such as the transmembrane receptor Notch and its membrane-bound ligand Delta  
51 (Artavanis-Tsakonas et al., 1999), or the contact-dependent depolarization and repulsion between  
52 different pigment cell types in zebrafish stripe patterning (Eom and Parichy, 2017; Inaba et al., 2012;  
53 Nusslein-Volhard, 2012). The absence of these mechanisms means plants are model systems for  
54 isolating and studying the role of local ligand secretion in pattern formation independently of  
55 variables such as cell movement or apoptosis (Torii, 2012b).

56 Stomata, the pores on the plant epidermis responsible for mediating gas exchange and water  
57 control, differentiate according to a special cue, which enforces the “one-cell spacing rule” in which  
58 no two stomata develop adjacent to each other (Bergmann and Sack, 2007; Pillitteri and Torii, 2012).  
59 Locally, stomatal spatial patterning is enforced through a family of small secreted peptide ligands  
60 called EPIDERMAL PATTERNING FACTORS (EPFs), which are perceived by a family of ERECTA-  
61 family receptor kinases and their signal modulator TOO MANY MOUTHS (TMM) (Hara et al., 2007;  
62 Hara et al., 2009; Hunt and Gray, 2009; Lee et al., 2012; Nadeau and Sack, 2002; Shpak et al.,  
63 2005; Torii, 2012a). Perception of EPF2 peptide inhibits the entry into stomatal cell lineages (Hara  
64 et al., 2009; Hunt and Gray, 2009). Antagonistically, EPF-LIKE9 (EPFL9), also known as Stomagen,  
65 is secreted from the subepidermal tissue into the epidermis, and promotes stomatal differentiation  
66 via competing for receptor binding with EPF2, and also likely with EPF1 (Kondo et al., 2010; Lee et  
67 al., 2015; Sugano et al., 2010). At a later stage, spatial patterning of stomata and differentiation of a  
68 stomatal precursor, known as a meristemoid, is controlled by EPF1 (Hara et al., 2007; Qi et al.,

69 2017). Consistent with their function as signaling ligands controlling stomatal development, ectopic  
70 overexpression or peptide application of EPF1 and EPF2 confer epidermis devoid of stomata, the  
71 former with arrested meristemoids and the latter with reduced stomatal lineage cells (Hara et al.,  
72 2007; Hara et al., 2009; Hunt and Gray, 2009). Conversely, Stomagen overexpression or peptide  
73 application confers stomatal clusters, resembling the loss of *TMM* or three *ERECTA*-family genes  
74 (Kondo et al., 2010; Sugano et al., 2010).

75 Globally, long range signals are also necessary to optimize stomatal patterning for its  
76 physiological functions of mediating gas exchange, water exchange, and photosynthetic efficiency  
77 (Hetherington and Woodward, 2003). Small chemical hormones such as ethylene increase stomata  
78 (Serna and Fenoll, 1996), whereas others such as abscisic acid reduce their number (Tanaka et al.,  
79 2013), but the effect of these individual chemicals can depend on the tissue or species (Qi and Torii,  
80 2018). Auxin is another hormone that broadly regulates plant development, but its inhibition of  
81 stomatal density partly depends on the absence of light, illustrating the integration of environmental  
82 information as another set of signals (Balcerowicz et al., 2014; Hronkova et al., 2015; Zhang et al.,  
83 2014). Furthermore, environmental factors perceived in mature leaves may affect density in younger  
84 leaves, demonstrating a spatial propagation of signaling that connects local and global contexts of  
85 patterning (Casson and Gray, 2008).

86 Whereas endogenous and environmental factors controlling stomatal development have  
87 been described in detail, much less well understood is how these signals propagate their efficacy in  
88 cell-to-cell communication to constitute the emergence of stomatal spatial patterning across the  
89 epidermis. The expression of Stomagen in the mesophyll indicates non-cell-autonomous effects  
90 across tissue layers, but the range of these signals as they travel between these cells is unknown.  
91 One way to assess the movement of signaling peptides is to directly visualize their movement.  
92 However, the addition of fluorescent protein tags, such as GFP, impairs the movement of peptide  
93 hormones, and the highly processed nature of some peptides hampers such approach. Moreover,

94 such visualization does not address the extent of how signaling peptides influence the local spatial  
95 patterning of stomata or whether there is any intersection with global epidermal patterning.

96 To address these questions, we harnessed *Cre-lox* recombination and the GAL4/UAS  
97 transactivation system (Heidstra et al., 2004) to generate mosaics in which peptide overexpression  
98 was localized to sectors of epidermal tissue. To quantitatively analyze these effective ranges, we  
99 then developed SPACE (Stomata Patterning Auto Correlation on Epidermis), a computational  
100 pipeline that applies spatial correlation techniques. Rather than traditional stomatal phenotype  
101 metrics, such as stomata index or density, neither of which describes the two-dimensional spatial  
102 patterning, our SPACE analysis revealed the effective range of EPF and Stomagen peptides in  
103 influencing epidermal patterning. Our study establishes the roles of EPF-family peptides as signals  
104 for cell-to-cell communication and the ranges at which they act. Our study also highlights the use of  
105 a spatial correlation approach to analyzing stomata patterning that can be adapted for analyzing  
106 both local and global signals, addressing the growing need for such techniques in phenotypic  
107 analysis of pattern formation.

108

109

## 110 **Results**

111

### 112 **Genetic Mosaic Analysis Demonstrate Non-Cell-Autonomous actions of EPF1 and** 113 **STOMAGEN**

114 To address how EPF/EPFL peptides spatially influence stomatal patterning in a non-cell autonomous  
115 manner, we generated seedlings with genetic mosaic sectors overproducing individual EPF/EPFL  
116 peptides of opposite biological functions: EPF1, which restricts stomatal development and  
117 STOMAGEN, which promotes stomatal development (Hara et al., 2007; Sugano et al., 2010). For  
118 this purpose, we implemented *Cre-lox* recombination coupled with the two-component GAL4/UAS  
119 transactivation system (Heidstra et al., 2004). Here, heat-shock treatment induces the expression of

120 a CRE recombinase, which acts on two Lox-p sites to create GAL4+ sectors. Within the sectors,  
121 both endoplasmic reticulum-trapped green fluorescent protein (GFP<sub>ER</sub>), which marks the sectors in  
122 a cell autonomous manner, and *EPF/EPFL* peptide genes (either *EPF1* or *STOMAGEN/EPFL9*)  
123 were simultaneously overexpressed (Fig. 1A, B). To accurately monitor the non-cell autonomous  
124 effects of these *EPF/EPFL* genes, we expressed the non-epitope tagged EPF1 and STOMAGEN  
125 rather than a fluorescent proteins fusion (e.g. CFP/RFP) that may impact the behavior of these small  
126 secreted peptides. Our heat-shock conditions yielded high frequency of genetic mosaics per  
127 seedlings screened (13.9% to 100%; Table S1). Durations of heat-shock treatment were carefully  
128 analyzed to yield sectors of comparable size and number per cotyledon (see Methods). Quantitative  
129 RT-PCR analysis confirmed that our heat-sock treatment led to elevated expressions of *EPF1* and  
130 *STOMAGEN* transcripts (Fig. 1C).

131 To test that GFP<sub>ER</sub> expression alone would not affect stomatal patterning or density, we also  
132 heat-shock treated seedlings harboring control empty-vector to generate control GFP sectors that  
133 do not overexpress EPF1/STOMAGEN peptide (Fig. 1). Furthermore, to determine whether the  
134 shape of sectors itself would affect quantification, sector outlines from mosaics were overlaid onto  
135 heat shocked wild-type cotyledons to create virtual “geometric sectors” as another control.

136 We first analyzed the stomatal phenotype within GFP<sub>ER</sub>-marked sectors (Fig. 1C, D). As  
137 expected, stomatal index (SI: number of stomata/(number of stomata + non-stomatal epidermal  
138 cells) x100) was significantly reduced within the EPF1-expressing sectors ( $p=3.7e-10$ ) whereas it  
139 increased within the STOMAGEN-expressing sectors ( $p=0.043$ ) (Fig. 1D). No statistical difference  
140 was observed in the stomatal index within control empty sectors when compared to the geometric  
141 sectors on wild type ( $p=0.91$ ) (Fig. 1D), confirming that heat shock treatment or GFP<sub>ER</sub> expression  
142 does not influence stomatal development, and that sector shape does not bias quantification. Within  
143 the STOMAGEN-sectors, stomata developed in clusters (Fig. 1C), thus verifying that our sector  
144 overexpression functioned as intended (Hara et al., 2007; Kondo et al., 2010; Lee et al., 2015; Lee  
145 et al., 2012; Sugano et al., 2010).

146           Next, we examined whether stomatal development in epidermal tissue near but not inside the  
147 GFP<sub>ER</sub> sectors was also inhibited or promoted by peptide overexpression from these sectors (Fig.  
148 1A, B, D-G). Examining the confocal images of cotyledon epidermis, it appears that regions  
149 surrounding EPF1- sectors tend to be devoid of stomata, whereas regions surrounding STOMAGEN-  
150 sectors differentiate more stomata (Fig. 1D). For a quantitative analysis, we measured the stomatal  
151 index for cells within each sector (Fig. 1A, bottom panel, green), adjacent to a sector (Fig. 1A, bottom  
152 panel, purple), or neighboring a sector-adjacent cell (Fig. 1A, bottom panel lilac). Indeed, stomatal  
153 index of cells adjacent to EPF1-expressing sectors was reduced ( $p=5.4e-9$ ), and stomatal index near  
154 STOMAGEN-expressing sectors was increased ( $p=0.0030$ ) (Fig. 1F). On the other hand, stomatal  
155 index adjacent to control empty sectors was not statistically different from those inside the control  
156 control empty sectors or on heat-shocked wild-type geometric sectors (Fig. 1E, F). Likewise, the  
157 stomatal index on cells that neighbored a sector-adjacent cell, i.e. those at a two-cell distance away  
158 from the sector (Fig. 1G). It can be seen, however, that whereas the stomatal index near EPF1-  
159 expressing sectors remained lower than in control empty vectors or wild-type, stomatal production  
160 gradually increased for cells farther away from EPF1-sectors (Fig. 1G), suggesting that sector's  
161 impact on stomatal patterning weakened with distance. Combined, these mosaic sector analyses  
162 directly demonstrate the non-cell autonomous actions of EPF/EPFL peptides in adjacent and nearby  
163 epidermal cells.

164  
165 **EPF1 Secreted from the Mesophyll Can Inhibit Stomatal Development**  
166 Stomagen is known to secrete from the developing mesophyll layer to promote stomatal  
167 development in the epidermis [4]. To address whether EPF/EPFL family peptides have an intrinsic  
168 property to function across tissue layers, we sought to test if EPF1 expressed in the mesophyll could  
169 also affect stomatal development in the epidermis. For this purpose, we identified GFP<sub>ER</sub> sectors  
170 induced exclusively in the mesophyll (Fig. 2A-B), and subsequently measured the stomatal index in  
171 the adaxial epidermal cells located directly above these sectors (Fig. 2C-E). As expected, Stomagen

172 expression from mesophyll sectors promoted stomatal development (Fig. 2G). Conversely, EPF1  
173 expressing mesophyll sectors inhibited stomatal development, in the adjacent epidermal cells  
174 (Figure 2G). As before, we extended our quantification to address whether this disruption to stomatal  
175 patterning acted at a larger range, in cells that did not directly neighbor the mesophyll cells of interest  
176 (Fig. 2F, H). Taken together, we conclude that, like Stomagen, EPF1 is capable of influencing the  
177 epidermis via secretion from the mesophyll in a non-cell-autonomous way if ectopically expressed.

178

### 179 **EPF1 and Stomagen Act in a Limited Effective Range**

180 Our results demonstrate that EPF1 and Stomagen act non-cell-autonomously, but do not address  
181 the distance at which these peptides can act to influence epidermal cell fate. We first analyzed this  
182 effective range by developing a computational pipeline to quantitatively analyze the stomatal density  
183 at various distances relative to the sectors (see Methods). Briefly, full tile-scanned confocal images  
184 of entire cotyledons were first converted into a 2-D spatial coordinate plot of the XY-coordinates of  
185 every single stomata of an entire cotyledon, sector outlines, and cotyledon outlines (Fig. 3A-C).  
186 Subsequently, stomatal density was calculated in the following regions: epidermal tissue inside the  
187 GFP<sub>ER</sub> sector outline (“the sector region”), epidermal tissue located within a 100  $\mu$ m range of the  
188 GFP<sub>ER</sub> sector outline excluding the sector interior itself (“the nearby region”), and the rest epidermal  
189 tissue beyond the 100  $\mu$ m range (“the faraway region”) (Fig. 3C).

190 As observed previously via stomatal index, the stomatal density inside EPF1-sectors was  
191 reduced and the stomatal density inside STOMAGEN-sectors increased when compared to control,  
192 empty vector sectors ( $p=0.020$  for EPF1-sectors;  $0.013$  for STOMAGEN-sectors)(Fig. 3D). In “the  
193 nearby region” of a 100  $\mu$ m range around sectors, the effect of these peptides on stomatal density  
194 remained statistically significant ( $p=0.028$  for EPF1-sectors;  $p=0.046$  for STOMAGEN-sectors)(Fig.  
195 3D, Fig. S2), suggesting that non-cell autonomous actions of these secreted EPF/EPFL peptides  
196 are not constrained by cellular geometry. However, STOMAGEN-sectors did not impact the stomatal  
197 density of the “faraway region” beyond 100  $\mu$ m in a statistically significant manner ( $p=0.178$ )



198 whereas the presence of EPF1-sectors did ( $p=0.042$ ), relative to the stomatal density faraway from  
199 control sectors (Fig. 3F). The results suggest that the non-cell-autonomous effects of STOMAGEN  
200 are local and limited in range. A comparison of within sector, “the nearby region” and the rest of  
201 cotyledons within each sector type revealed that both control vector-only sectors and STOMAGEN-  
202 sectors do not exhibit statistical significance, whereas a gradual decay of EPF1 effects was evident  
203 (Fig. 3G).

204 We further expanded the “nearby region” to within 200  $\mu\text{m}$  to explore whether doubling the  
205 range of would reveal different patterns of effective range (Fig. S3). At this range, the stomatal  
206 density of “nearby region” of STOMAGEN-sectors and control empty vectors were no longer  
207 statistically differed ( $p=0.058$ ) whereas that of EPF1 remained effective ( $p=0.034$ )(Fig. S3). Similar  
208 to the analysis at 100  $\mu\text{m}$  range (Fig. 3), stomatal density differed among the three defined regions  
209 for cotyledons with EPF1-sectors decayed with a distance ( $p = 0.00028$ ). Our findings are consistent  
210 with the role of EPF1 as secreted peptide inhibiting stomatal development and indicate that both  
211 EPF1 and STOMAGEN have limited effective range. Due to a rapidly changing heterogeneity of  
212 peptide’s impacts on stomatal density in a gradient manner, however, we conclude that precise  
213 quantification of their effective range requires a different metric.

214

### 215 **Spatial Autocorrelation SPACE Analysis Quantifies 2-D Spatial Patterning of Stomata**

216 Our goal here is to quantitatively determine the effective range of peptide signals influencing  
217 epidermal patterning. However, currently available and widely-adopted quantification methods,  
218 stomatal density and index do not take into account of any 2-D spatial information, whereas they can  
219 only infer that the non-cell autonomous effects exist (Figs. 1-3). The stomatal density represents  
220 numbers of stomata in a given region of interest (ROI), and the stomatal index represents a  
221 percentage of stomata in a given numbers of epidermal cells. With these simplistic parameters, it is  
222 not possible to normalize the inherent heterogeneity of mosaic sector size and geometry, which are  
223 constrained by individual size and geometry of epidermal cells constituting GFP<sub>ER</sub> sectors. Likewise,

224 the exact locations and numbers of individual sectors within a field of cotyledon epidermis will be  
225 unique to individual heat-shock events. Hence, it is imperative to develop a new technique for  
226 quantitative description of stomatal spatial patterning.

227 To this end, we adapted a statistical technique used by astrophysicists to measure spatial  
228 correlation between galaxies at different separations (Landy and Szalay, 1993; Peebles, 1974) (Fig.  
229 4). Stomata are treated as spatial coordinates generated from an unknown probability distribution  
230 that determines their spatial patterning (Fig. 4A, D, G). Unlike the probability itself (Fig. 4C, F, I),  
231 which cannot be determined from the sample alone, the spatial correlation function can be calculated  
232 directly from the stomata as an accurate and effective approximation of the true probability  
233 distribution. The spatial correlation statistic describes this probabilistic distribution of stomata as a  
234 function of distance from a sector edge (Fig. 4). If, at a certain distance away from the edge of a  
235 GFP<sub>ER</sub> sector, stomata are more likely to be found than randomly distributed, stomatal production is  
236 positively correlated with sector location (Fig. 4E, F). If stomata are less likely to be found than a  
237 randomly generated point, stomatal production is negatively correlated with sector correlation (Fig.  
238 4G, H). If stomata production at a distance is equally likely as random point generation, this implies  
239 zero correlation between stomata production and the sector at that range (Fig. 4B, C).

240 To calculate spatial correlation, we plotted 2-D positions (XY coordinates) of every single  
241 stoma on an entire cotyledon, sector outlines, and cotyledon outlines from each full tile-scanned  
242 confocal Z-stack images of entire cotyledons (Fig. 5A, top and middle). To compare, we  
243 computationally generated a thousand sets of random point distributions of 'dummy' stomata, which  
244 are exactly the same total numbers as that of the 'real' stomata within the identical cotyledon outline  
245 (Fig. 5A bottom; see Methods). The nearest Euclidan distance was calculated between each stoma  
246 and the edge of a sector outline, excluding stomata inside the sector, and for every random set, the  
247 nearest Euclidean distance was calculated between each random point and the edge of a sector  
248 outline. (Fig. 5B; see Methods). After repeating this process for a thousand equally-sized sets of  
249 random points per cotyledon, the aggregate distribution of distances between random points and

250 sectors approached its expected probability and allowed us to calculate stomatal spatial correlation  
251 as a function of distance (see Methods for further details and calculations). Because the random  
252 point sets are equal in size to the stomata index, and because the random points are generated  
253 within the same cotyledon outline as the stomata, this method enables us to quantify changes in  
254 stomatal distribution at different distances relative to GFP<sub>ER</sub> sectors, independent of leaf shape, leaf  
255 size, sector placement, or sector size in a way stomatal density could not. Furthermore, the  
256 magnitude of spatial correlation quantifies the degree of change in stomatal distribution, allowing us  
257 to measure how the influence of peptide overexpression changes with distance.

258

### 259 **EPF1 and Stomagen Differ in Effective Range**

260 The SPACE analysis generated a probabilistic distribution of stomata in the function of distance from  
261 the sector boundary (Fig. 5). Control, empty-vector-only sector did not show substantial positive- or  
262 negative correlations but exhibited fluctuations within the short distance: immediate subtle drop and  
263 re-gained subtle peak at around 50  $\mu\text{m}$ , with repeated pattern of subtle peak at around 150  $\mu\text{m}$ ,  
264 which may correspond to the one-cell spacing rule of stomata (stomata intercepted by one pavement  
265 cell)(Fig. 5C). At close distances, stomatal production was negatively correlated with EPF1 sectors,  
266 positively correlated with Stomagen sectors, and uncorrelated with control empty vector sectors  
267 (Figure 5C). At farther distances, spatial correlation between stomata production and peptide  
268 overexpression became zero for both EPF1 and Stomagen, demonstrating that our spatial  
269 correlation method can quantify what we visually observed from the tile scans. Through this  
270 approach, we were also able to identify the distance at which correlation becomes zero, which  
271 implies an effective range for the overexpression of each peptide. Sectors of EPF1 overexpression  
272 had an effective range of 170  $\mu\text{m}$  and sectors of Stomagen overexpression had an effective range  
273 of 60  $\mu\text{m}$ . These results suggest production of EPF1 is capable of affecting stomatal development  
274 at farther ranges than Stomagen. Furthermore, absence of discernable effects beyond 300  $\mu\text{m}$

275 implies that local manipulation of stomatal patterning by sector overexpression of EPF-family  
276 peptides may not influence the global stomatal patterning throughout the cotyledon.

277

278

## 279 **Discussion**

280

281 Members of the EPF-family of peptides regulate stomatal development at distinct stages to enforce  
282 proper spacing across the epidermis. Our study establishes the extent of EPF1 and Stomagen's  
283 non-cell-autonomous capability to influence stomatal patterning. To address the limitations of  
284 standard phenotypic analyses, such as stomatal index and density, we created a computational  
285 pipeline SPACE to apply a correlation-based spatial point analysis and precisely quantify the  
286 peptides' effective ranges of action.

287

## 288 **Correlation-Based Approaches in Stomatal Patterning**

289 There is a growing need for quantifying stomatal patterns at higher spatial resolution, because  
290 stomatal mutants may have similar densities but different patterning as underlied by the distinct  
291 molecular mechanisms. A common statistic to address this is, in addition to the stomatal index, a  
292 count of stomata clusters that violate the one-cell spacing rule, thus extending stomatal index to  
293 clustering index or histograms to display their distributions. Our analysis of stomatal density across  
294 mosaic-cotyledons indicates that the reduction in stomatal density due to the presence of EPF1-  
295 sectors decayed with distance, and that its impact on the stomatal phenotype acted as a gradient.  
296 The rapidly changing heterogeneity of the peptide's impact on patterning makes not only stomatal  
297 density a limited approach, but also the most common extensions to counting statistics such as the  
298 aforementioned cluster index. Thus, while we established the existence of an EPF1 effective range  
299 and a gradient in stomatal phenotype, quantifying their values with precision necessitated a different  
300 metric, the SPACE.

301           Statistical methods of spatial point analysis from other fields have begun to be embraced,  
302 and it is vital to find the specific metric suitable to extract the information each individual study needs.  
303 One such technique is the use of Betti numbers from Persistent Homology (Haus et al., 2018).  
304 Applied to stomatal patterning, the 0<sup>th</sup> Betti number counts the number of stomata clusters (called  
305 “components”) across a leaf that remain separate when stomata are connected by a radius of given  
306 distance. Increasing the radius gradually decreases the total number of connected components, until  
307 they eventually merge into a single set, allowing one to see how the topology of stomatal distribution  
308 changes across varying spatial resolutions. To elucidate how local overproduction of stomatal  
309 peptide impacts patterning, it is necessary to utilize an algorithm that can determine the strength of  
310 disruption as a function of distance from a particular location (the sector), rather than the pattern’s  
311 overall connectedness. It would also be difficult to interpret Betti numbers for *EPF1*-overexpressing  
312 mosaics in particular, as there are little to no stomata in or near the sectors to connect to, no matter  
313 the distance. Therefore, we require our choice of metric to measure pairwise interactions and to  
314 have a bivariate form applicable to two separate point distributions: the sector outline and the  
315 stomata.

316           *EPF1*’s longer correlation length compared to *Stomagen*’s may come as a surprise when it  
317 is known that in wild-type, *Stomagen* is first expressed in the subepidermal tissue, which eventually  
318 differentiates into the mesophyll, before secreting to influence stomatal patterning in the epidermis.  
319 By contrast, *EPF1* expression is in the epidermis itself. In the context of an activator-inhibitor system  
320 such as in Turing patterns, though, it is necessary that the inhibitor is longer in range than the  
321 activator as observed in this study (Kondo and Miura, 2010; Meinhardt, 2012). Regardless, before  
322 interpretation it must be noted that a peptide’s correlation or anticorrelation length, also describable  
323 as an effective range of action, is not equivalent to an effective range of diffusion. Mechanisms that  
324 contribute to an effective range of action also include the threshold of concentration each peptide  
325 must have within a cell to change a cell fate decision, the geometry of cell expansion (e.g. pavement  
326 cell geometry), and potential regulatory feedback loops. For instance, clusters of stomata produced

327 by a Stomagen sector might produce and secrete EPF1 to cells further away, buffering against the  
328 Stomagen overexpression. Further studies are required to elucidate the degree to which these  
329 individual mechanisms contribute to the measured correlation lengths and amplitudes.

330         However, this approach of quantification enables each of these mechanisms to be viewed as  
331 a variable that fine-tunes the correlation function. Different features of the matter correlation function  
332 enable physicists to study the mechanism that dominates that region of the function, such as gravity  
333 or baryonic acoustic oscillations (Cole et al., 2005; Eisenstein et al., 2005). Analogously, different  
334 features of a stomatal correlation function may correspond to specific genes or mechanisms in  
335 stomatal patterning. Our SPACE pipeline is not limited to the context of stomatal development,  
336 either: It could be utilized for quantitative analyses of phenotypic characteristics and mathematical  
337 constraint broadly to the study of spatial patterns of individual cell fate, such as floral spot patterning  
338 (Ding et al., 2020) .

339

#### 340 **Local and Global Patterning in Stomatal Development**

341 It has been reported that Stomagen as well as EPFL4 and EPFL6/CHALLAH are expressed in the  
342 non-epidermal tissues, but they could modulate stomatal patterning (Abrash et al., 2011; Kondo et  
343 al., 2010; Sugano et al., 2010; Uchida et al., 2012). Consistent with these findings, our study  
344 identified EPF1-expressing sectors exclusive to the mesophyll still inhibited stomatal development  
345 in the nearby epidermis (Fig. 2). Combined, these results highlight the necessity of viewing stomata  
346 development as a multidimensional system that acts and coordinates across multiple tissues. EPF  
347 peptides may play a key role in the inter-tissue communication between the stomata mediating gas  
348 exchange and the photosynthetic mesophyll. A recent study highlights the importance of mature  
349 functional stomata and actual gas exchange for mesophyll air-space morphogenesis (Lundgren et  
350 al., 2019). Thus, inter-tissue-layer communication involves peptide signaling at an early  
351 developmental stage and mechanical/physiological feedback during maturation. The expression of  
352 EPF peptides in internal tissues also raises the question of stomatal signaling between the abaxial

353 and adaxial sides of the leaf. In future studies, the correlation in stomata positioning between the  
354 abaxial and adaxial stomata on the same cotyledon could be measured.

355 Previous studies have shown the presence of long-range hormone signaling that acts on  
356 stomatal development (Casson and Gray, 2008; Qi and Torii, 2018). In this study, we developed a  
357 pipeline that enables the quantitative measurement of spatial correlation and density at different  
358 scales of distances, separating local and global features of stomatal patterning and production. Our  
359 SPACE analysis could be used to address whether local manipulation of stomatal development may  
360 in turn influence the global stomatal patterns. For instance, locally upregulated EPF1 or Stomagen  
361 signaling could impinge on longer-range hormone signaling, such as auxin, to induce compensatory  
362 increase or decrease of stomatal development in globally. In fact, auxin and EPFL2 peptide signaling  
363 pathways constitute negative feedback during leaf morphogenesis (Tameshige et al., 2016). On the  
364 contrary, we observed that in the epidermal tissue defined as far away from Stomagen-expressing  
365 or EPF1-expressing sectors, stomatal patterning returned to normal both in density and in correlation  
366 (Figure 4). The lack of evident compensation could be explained by several possibilities. For instance,  
367 local manipulations of small EPF1/Stomagen-expressing sectors are not sufficient to trigger above-  
368 threshold compensatory response. It has been reported that overall mechanical properties of leaf  
369 epidermis could impact the polarity of a stomatal-lineage cells (Bringmann and Bergmann, 2017).  
370 Secondary changes in stomatal signaling due to sector overexpression may 'buffer' the global  
371 influence. Our system may be more applicable to studying the global ripple of local perturbations in  
372 mature leaves, as physiological feedback increases in importance. With the pipeline to detect and  
373 quantify local vs. global patterns in hand, future studies of mechanical and physiological feedbacks  
374 will provide the full picture of stomatal development in the context of whole functional leaf.

375

376

377

378

## 379 **MATERIALS AND METHODS**

380

### 381 **Plant Materials and Growth Conditions**

382 *Arabidopsis thaliana* Columbia (Col) accession was used as wild type. The Cre-Lox Gal4-UAS  
383 system used was reported previously [2]. Transgenes were generated by genetic crosses or  
384 *Agrobacterium*-mediated transformation (see Method Details) in the Col-0 background, with  
385 genotypes confirmed through PCR. See Table S1 for a list of plasmids generated in this study and  
386 Table S2 for a list of primer sequences used for cloning and genotyping. Seeds were sown on 0.5 x  
387 Murashige and Skoog (MS) media containing 1 x Gamborg Vitamin (Sigma), 0.75% Bacto Agar, and  
388 1% sucrose. After stratification at 4°C for 2 days, seeds were grown in long-day condition at 21°C.  
389 To generate mosaics, seedlings 24 hours after germination received heat-shock in a 37°C incubator  
390 as described below.

391

### 392 **Molecular Cloning and Generation of Transgenic Plants**

393 The two component Cre-Lox system described previously (Heidstra et al., 2004) was modified to  
394 express full-length EPF1, EPF2, and Stomagen by the following means. EPF1 and EPF2 cDNA from  
395 pTK106 and pTK107, respectively (Lee et al., 2012), was digested with BamHI and EcoRI and ligated  
396 into pBnUASPTn to generate pTK109 and pTK110. Stomagen cDNA was PCR amplified using a  
397 plasmid pTK129 as a template and cloned into pCR2.1 TOPO vector (ThermoFisher/Invitrogen) to  
398 generate pJS104 and sequence confirmed. Subsequently, the insert was ligated into pBnUASPTn  
399 to generate pJS105. These constructs were digested by NotI and ligated into pGII277-HSCREN2  
400 vector to generate pTK111, pTK112, and pJS106. These three plasmids and pCB1 were individually  
401 transformed into *Agrobacterium* GV3101 (pMP90) in the presence of pSOUP (Hellens et al., 2000),  
402 and subsequently into *Arabidopsis* by floral dipping. More than 48 T1 plants were characterized.  
403 Three lines each of pTK111, pTK112, and pJS106 with a monogenic inheritance of selection markers  
404 were subjected to genetic crosses with the pCB1 lines, and two-to-three lines were chosen for a



405 further analysis based on the heat-shock inducibility of *Cre* transgene as well as formation of  
406 chimeric sectors (see below). As a control, pGII277-HSCREN2 vector was transformed into pCB1  
407 transgenic line. See Table S1 for a list of plasmids generated in this study and Table S2 for a list of  
408 primer sequences used for molecular cloning and genotyping of the transgenes.

409

#### 410 **Heat-Shock Induction and Sector Identification**

411 To generate mosaics, seeds after 4°C stratification were grown in long-day conditions at 21°C. 24  
412 hours after germination, seedlings were heat-shocked in a 37°C incubator. We first tested variable  
413 duration of heat shock treatment and optimized the resulting GFP+ sector size and number. Heat-  
414 shock treatment lasted fifteen minutes to generate mosaics used in imaging experiments and lasted  
415 one hour to generate mosaics used in qRT-PCR experiments. Prior to imaging experiments for 7-  
416 day old seedlings or qRT-PCR experiments for 5-day old seedlings detailed below, seedlings with  
417 mosaic overexpression were identified using a dissecting microscope equipped with GFP  
418 fluorescence detection, Leica M165FC (Leica). We initially sought to include EPF2, an EPF/EPFL  
419 family peptide restricting the initiation of stomatal development, to our pipeline. However, due to the  
420 early events of EPF2-mediated repression of stomatal initiation during seedling germination (1-2  
421 days)(Hara et al., 2009), a timeframe of heat-shock induced recombination and mosaic  
422 overexpression was too late to induce clear effects. For this reason, EPF2 sectors were not pursued.

423

#### 424 **Reverse-transcription PCR**

425 Five-day old seedlings treated with heat-shock as described above were subjected RNA preparation  
426 using RNAeasy kit (Qiagen). Subsequently, cDNA was synthesized using the iScript cDNA synthesis  
427 kit (Bio-Rad) according to instructions of the manufacturer. First-strand cDNA was diluted to a  
428 seventh in double distilled water and used as template for qRT PCR. Quantitative RT-PCR was  
429 performed as described previously (Han et al., 2018) with a CFX96 real-time PCR detection system  
430 (Bio-Rad) using iTaq SYBR Green Supermix with ROX (Bio-Rad). Relative expression was

431 calculated by dividing *ACT2* gene expression over the specific-gene expression. For each  
432 experiment, three technical replicates were performed. RT-PCR was performed as described  
433 previously (Lee et al., 2012). See Supplementary materials Table S2 for a list of primer sequences.

434  
435 **Microscopy**  
436 Confocal laser scanning microscopy images of seven-day old seedlings were taken with the Zeiss-  
437 LSM700 (Zeiss) or the Leica SP5-WLL (Leica). Cell peripheries were visualized with propidium  
438 iodide (PI: Molecular Probes, Carlsbad, CA). GFP and PI signals were detected with excitation at  
439 488 nm and 555 nm, respectively, and emission at 500-524 nm and 569-652 nm, respectively. For  
440 quantitative analysis of mosaic sectors, 3-D confocal images of entire individual cotyledons (covering  
441 the adaxial epidermis and underneath mesophyll layer) were generated by tiling Z-stack frames (9-  
442 16 tiles, each with 18-45 slices for intervals of 5-10  $\mu\text{m}$  covering entire cotyledon thickness and area)  
443 and stitched using Leica Application Suite AF tile scan functionality. For figure preparation,  
444 brightness and contrast of images were uniformly adjusted using Photoshop CC (Adobe).

445  
446 **QUANTIFICATION AND STATISTICAL ANALYSIS**

447  
448 **Tile Scan Analysis and Quantification**

449 The tile scan images were analyzed using Imaris 9.2 (Bitplane) as following. First, GFP-expressing  
450 3-D sectors were segmented using the Surface function by thresholding the absolute intensity of the  
451 green channel, with background autofluorescence subtracted afterward. Next, sector outlines, the  
452 full cotyledon outline, and the stomatal positions were recorded with 3-D voxel spatial coordinates  
453 using the Spots function. These spatial coordinates were then exported to Microsoft Excel v.16.32  
454 as .xlsx workbooks (Microsoft), then converted to .xlsx format for quantitative two-dimensional spatial  
455 analysis detailed below. To identify GFP sectors generated exclusively in the mesophyll, 3-D images  
456 of sectors were analyzed in the XZ and YZ planes using Leica Application Suite AF's Orthogonal

457 View, as well as in three spatial dimensions using Imaris 3-D volume rendering. Mesophyll-exclusive  
458 sectors were segmented and their positional outlines were marked in the same procedure as  
459 described above.

460

#### 461 **Geometric Sectors for Heat-Shocked Wild-Type**

462 In addition to empty vector GFP sectors (“control sectors”), sector outlines were overlaid onto heat-  
463 shocked wild-type cotyledons as another control (“geometric sectors”). To generate geometric  
464 sectors, the coordinates recorded from the outlines of real mosaic GFP-expressing sectors were  
465 overlaid onto heat-shocked wild-type cotyledons. Sector outlines were transposed onto wild-type  
466 images without bias by randomly generating a shift to the center of the sector outline before plotting  
467 it on the image. If part of the newly transposed sector fell outside the boundary of the wild-type  
468 cotyledon outline, it was excluded from stomata quantification analysis. For calculating the stomatal  
469 index inside and nearby geometric sectors, any cell with at least half of its area contained inside the  
470 sector outline was considered part of the geometric sector.

471

#### 472 **Quantitative Two-Dimensional Spatial Analysis**

473 Spreadsheets of stomatal coordinates, sector outline coordinates, and cotyledon outline  
474 coordinates, recorded in three dimensions as described above, were processed and analyzed using  
475 SPACE (Stomata Patterning Auto Correlation on Epidermis), a pipeline of Python scripts we wrote  
476 (available at <https://github.com/ToriiLab/CreLox>). Stomata, sectors, and cotyledons were plotted,  
477 visualized, and analyzed two dimensionally using their XY coordinates. To determine a cotyledon’s  
478 stomatal density within GFP-sectors, our script calculates the number of stomata inside a sector  
479 outline and the area enclosed by the outline. Cotyledons with multiple sectors of GFP-expression  
480 had stomata counts and sector areas aggregated before calculating the cotyledon’s overall stomatal  
481 density within sectors as single sample point.

482 To calculate stomatal density within a 100  $\mu\text{m}$  range of sectors, a new outline was generated  
483 by applying a 100  $\mu\text{m}$  radially outward shift to each sector outline coordinate. Stomata and epidermal  
484 area enclosed by the new outlines were then calculated to find the stomatal density in this region,  
485 excluding the region enclosed by the original sector outlines and any region extending beyond the  
486 cotyledon outline. For cotyledons with multiple sectors, calculations were done for the union of the  
487 new outlines, to avoid counting overlapping regions multiple times. This same process was then  
488 repeated for a 200  $\mu\text{m}$  range.

489 To calculate the spatial correlation function between stomata positions and sector outlines,  
490 the nearest Euclidean distance was calculated between each stoma and the edge of a sector outline,  
491 excluding stomata inside a sector. The same process was repeated for a thousand times, each with  
492 independently generated random point distributions within the cotyledon outline, each equal in size  
493 to the total number of stomata across the leaf. Random point distributions were generated by first  
494 producing five times in excess the number of stomatal points within a rectangle, then running a  
495 function to keep only the random points lying within the cotyledon outline, and finally only keeping  
496 the first N points in a list, where N was the same as the number of actual stomata. Distances between  
497 sectors and stomata, and distances between sectors and random points for each independent  
498 distribution, were counted in histograms of logarithmically spaced bin widths. The spatial correlation  
499 function  $\zeta$  between stomata positioning and sector location was calculated using the bivariate  
500 extension of the two-point correlation function in astronomy (Landy and Szalay, 1993; Peebles,  
501 1974), also known as the differential form of the Ripley's K function (Ripley, 1976):

$$Correlation(r_i) = \frac{S(r_i)}{\langle R(r_i) \rangle} - 1$$

502  
503 Where  $S(r_i)$  is the number of stomata counted between a distance of  $r_i$  and  $r_{i+1}$  away from a sector.  
504  $\langle R(r_i) \rangle$  is the expected value of the number of random points counted between a distance of  $r_i$  and  
505  $r_{i+1}$  away from a sector, estimated by averaging the number of points counted in that range of distance  
506 for 1000 random distributions. Because sector size may influence the range and magnitude of

507 correlation, our code filters sectors to only analyze those within a range of area. To avoid cross-  
508 correlations on cotyledons with multiple sectors, this analysis is also filtered for sectors located within  
509 200  $\mu\text{m}$  of each other on the same cotyledon. Confidence intervals were obtained via resampling  
510 techniques.

511

## 512 **Stomata-Stomata Autocorrelation Function**

513 To quantify stomatal patterning's autocorrelation with itself, the Euclidean distance between each  
514 unique pair of stomata, for all stomata, across a cotyledon, was calculated. As described above, the  
515 same process was repeated for a thousand independently generated random point distributions  
516 within the cotyledon outline, each equal in size to the total number of stomata across the cotyledon.  
517 Distances between pairs of stomata, distances between pairs of random points within a given  
518 distribution, and distances between stomata and random points of a given distribution, were counted  
519 in histograms of logarithmically spaced bin widths. The stomata autocorrelation function was  
520 calculated using the following estimator function used in astrophysics to minimize bias and variance  
521 of the two-point galaxy autocorrelation function [6]:

$$\zeta(r_i) = \frac{SS(r_i)}{\langle RR(r_i) \rangle} - 2 \frac{SR(r_i)}{\langle RR(r_i) \rangle} + 1$$

522  
523  $SS(r_i)$  is the number of stomatal pairs counted that are separated by a distance between  $r_i$  and  $r_{i+1}$ .  
524  $RR(r_i)$  is the number of random point pairs within one distribution counted that are separated by a  
525 distance between  $r_i$  and  $r_{i+1}$ .  $SR(r_i)$  is the number of distances separating a stomata and a random  
526 point between  $r_i$  and  $r_{i+1}$ . All three are normalized by the total number of pairs for that variable.  $\langle \rangle$   
527 indicates expected value and is estimated by averaging across 1000 randomly generated  
528 distributions.

529

## 530 **Statistics**

531 The Leica LAS AF software (Leica) and Imaris 9.2 (Bitplane) were used for image analysis as  
532 described above. Graphs were generated using R ggplot2 package or Python matplotlib. All scripts  
533 are available (GitHub account). A chi-squared test for statistical independence on 2x2 contingency  
534 tables was used for comparing the stomatal index between sectors of different peptide  
535 overexpression, in order to determine whether there was a statistically significant difference between  
536 the ratio of stomata to epidermal cells in one population versus another. The Mann-Whitney *U* test  
537 was used for comparing stomatal densities, as we do not assume stomatal density is normally  
538 distributed among the population.

539

#### 540 **Data and Code Availability**

541 All data, R scripts, and Python scripts for spatial analysis, are available at  
542 <https://github.com/ToriiLab/CreLox>.

543

#### 544 **Acknowledgements**

545 We thank Dr. Renze Heidstra for generously providing us the plasmids of HSpro::CRE, 35S::Gal4;  
546 GAL4UAS::GFP, GAL4UAS::Cre-Lox; Dr. Takeshi Kuroha and Janelle Sagawa for assisting  
547 molecular cloning and generating transgenic lines during the initial phase of the project; Dr. Xingyun  
548 Qi and Dr. Arvid Herrmann for expert advices on confocal microscopy; Kristen Miller and Dr.  
549 Eundeok Kim in expert assistance on qRT-PCR; and Dr. Akira Yoshinari for commenting on the  
550 manuscript. This work was supported by the Howard Hughes Medical Institute and Gordon and Betty  
551 Moore Foundation (GBMF-3035) to K.U.T. E.K.W.L. was supported by the Mary Gates Research  
552 Scholarship and Levinson Emerging Scholar Award from the University of Washington. K.U.T. holds  
553 the Johnson & Johnson Centennial Chair at the University of Texas at Austin and acknowledges the  
554 research support.

555

#### 556 **Author Contributions**

557 Conceived the project, K.U.T.; Supervised the project, K.U.T.; Designed experiments, E.K.W.L.,  
558 K.U.T.; Performed research, S.Z., E.K.W.L., Analyzed data, S.Z., E.K.W.L., K.U.T.; Developed  
559 SPACE analysis, S.Z., E.K.W.L., M.F.M., B.H.; Coding, S.Z., E.K.L., B.J.H.; Writing -original draft,  
560 S.Z., K.U.T.; Writing -editing and commenting, S.Z., E.K.L., M.F.M., B.J.H., K.U.T.; Funding  
561 acquisition, K.U.T.

562

563

## 564 References

- 565 **Abrash, E. B., Davies, K. A. and Bergmann, D. C.** (2011). Generation of signaling specificity in  
566 Arabidopsis by spatially restricted buffering of ligand-receptor interactions. *Plant Cell* **23**,  
567 2864-2879.
- 568 **Artavanis-Tsakonas, S., Rand, M. D. and Lake, R. J.** (1999). Notch signaling: cell fate control and  
569 signal integration in development. *Science* **284**, 770-776.
- 570 **Balcerowicz, M., Ranjan, A., Rupprecht, L., Fiene, G. and Hoecker, U.** (2014). Auxin represses  
571 stomatal development in dark-grown seedlings via Aux/IAA proteins. *Development* **141**,  
572 3165-3176.
- 573 **Bergmann, D. C. and Sack, F. D.** (2007). Stomatal development. *Annu Rev Plant Biol* **58**, 163-181.
- 574 **Bringmann, M. and Bergmann, D. C.** (2017). Tissue-wide Mechanical Forces Influence the Polarity  
575 of Stomatal Stem Cells in Arabidopsis. *Curr Biol* **27**, 877-883.
- 576 **Casson, S. and Gray, J. E.** (2008). Influence of environmental factors on stomatal development.  
577 *New Phytol* **178**, 9-23.
- 578 **Cole, S., Percival, W. J., Peacock, J. A., Norberg, P., Baugh, C. M., Frenk, C. S., Baldry, I.,  
579 Bland-Hawthorn, J., Bridges, T., Cannon, R., et al.** (2005). The 2dF Galaxy Redshift  
580 Survey: power-spectrum analysis of the final data set and cosmological implications. *Monthly  
581 Notices of the Royal Astronomical Society* **362**, 505-534.
- 582 **Ding, B., Patterson, E. L., Holalu, S. V., Li, J., Johnson, G. A., Stanley, L. E., Greenlee, A. B.,  
583 Peng, F., Bradshaw, H. D., Jr., Blinov, M. L., et al.** (2020). Two MYB Proteins in a Self-  
584 Organizing Activator-Inhibitor System Produce Spotted Pigmentation Patterns. *Curr Biol* **30**,  
585 802-814 e808.
- 586 **Eisenstein, D. J., Zehavi, I., Hogg, D. W., Scoccimarro, R., Blanton, M. R., Nichol, R. C.,  
587 Scranton, R., Seo, H.-J., Tegmark, M., Zheng, Z., et al.** (2005). Detection of the Baryon  
588 Acoustic Peak in the Large-Scale Correlation Function of SDSS Luminous Red Galaxies.  
589 *The Astrophysical Journal* **633**, 560-574.
- 590 **Eom, D. S. and Parichy, D. M.** (2017). A macrophage relay for long-distance signaling during  
591 postembryonic tissue remodeling. *Science* **355**, 1317-1320.
- 592 **Han, S. K., Qi, X. Y., Sugihara, K., Dang, J. H., Endo, T. A., Miller, K. L., Kim, E. D., Miura, T.  
593 and Torii, K. U.** (2018). MUTE Directly Orchestrates Cell-State Switch and the Single  
594 Symmetric Division to Create Stomata. *Dev Cell* **45**, 303-+.
- 595 **Hara, K., Kajita, R., Torii, K. U., Bergmann, D. C. and Kakimoto, T.** (2007). The secretory peptide  
596 gene EPF1 enforces the stomatal one-cell-spacing rule. *Genes & Development* **21**, 1720-  
597 1725.



- 598 **Hara, K., Yokoo, T., Kajita, R., Onishi, T., Yahata, S., Peterson, K. M., Torii, K. U. and Kakimoto,**  
599 **T.** (2009). Epidermal cell density is autoregulated via a secretory peptide, EPIDERMAL  
600 PATTERNING FACTOR 2 in Arabidopsis leaves. *Plant Cell Physiol* **50**, 1019-1031.
- 601 **Haus, M. J., Li, M., Chitwood, D. H. and Jacobs, T. W.** (2018). Long-Distance and Trans-  
602 Generational Stomatal Patterning by CO<sub>2</sub> Across Arabidopsis Organs. *Front Plant Sci* **9**,  
603 1714.
- 604 **Heidstra, R., Welch, D. and Scheres, B.** (2004). Mosaic analyses using marked activation and  
605 deletion clones dissect Arabidopsis SCARECROW action in asymmetric cell division. *Genes*  
606 *Dev* **18**, 1964-1969.
- 607 **Hellens, R. P., Edwards, E. A., Leyland, N. R., Bean, S. and Mullineaux, P. M.** (2000). pGreen:  
608 a versatile and flexible binary Ti vector for Agrobacterium-mediated plant transformation.  
609 *Plant Mol Biol* **42**, 819-832.
- 610 **Hetherington, A. M. and Woodward, F. I.** (2003). The role of stomata in sensing and driving  
611 environmental change. *Nature* **424**, 901-908.
- 612 **Hronkova, M., Wiesnerova, D., Simkova, M., Skupa, P., Dewitte, W., Vrablova, M., Zazimalova,**  
613 **E. and Santrucek, J.** (2015). Light-induced STOMAGEN-mediated stomatal development in  
614 Arabidopsis leaves. *J Exp Bot* **66**, 4621-4630.
- 615 **Hunt, L. and Gray, J. E.** (2009). The signaling peptide EPF2 controls asymmetric cell divisions  
616 during stomatal development. *Curr Biol* **19**, 864-869.
- 617 **Inaba, M., Yamanaka, H. and Kondo, S.** (2012). Pigment pattern formation by contact-dependent  
618 depolarization. *Science* **335**, 677.
- 619 **Kondo, S. and Miura, T.** (2010). Reaction-diffusion model as a framework for understanding  
620 biological pattern formation. *Science* **329**, 1616-1620.
- 621 **Kondo, T., Kajita, R., Miyazaki, A., Hokoyama, M., Nakamura-Miura, T., Mizuno, S., Masuda,**  
622 **Y., Irie, K., Tanaka, Y., Takada, S., et al.** (2010). Stomatal density is controlled by a  
623 mesophyll-derived signaling molecule. *Plant Cell Physiol* **51**, 1-8.
- 624 **Landy, S. D. and Szalay, A. S.** (1993). Bias and Variance of Angular Correlation Functions. *The*  
625 *Astrophysical Journal* **412**, 64.
- 626 **Lee, J. S., Hnilova, M., Maes, M., Lin, Y. C., Putarjunan, A., Han, S. K., Avila, J. and Torii, K. U.**  
627 (2015). Competitive binding of antagonistic peptides fine-tunes stomatal patterning. *Nature*  
628 **522**, 439-443.
- 629 **Lee, J. S., Kuroha, T., Hnilova, M., Khatayevich, D., Kanaoka, M. M., McAbee, J. M., Sarikaya,**  
630 **M., Tamerler, C. and Torii, K. U.** (2012). Direct interaction of ligand-receptor pairs specifying  
631 stomatal patterning. *Genes Dev* **26**, 126-136.
- 632 **Lundgren, M. R., Mathers, A., Baillie, A. L., Dunn, J., Wilson, M. J., Hunt, L., Pajor, R., Fradera-**  
633 **Soler, M., Rolfe, S., Osborne, C. P., et al.** (2019). Mesophyll porosity is modulated by the  
634 presence of functional stomata. *Nat Commun* **10**, 2825.
- 635 **Meinhardt, H.** (2012). Turing's theory of morphogenesis of 1952 and the subsequent discovery of  
636 the crucial role of local self-enhancement and long-range inhibition. *Interface Focus* **2**, 407-  
637 416.
- 638 **Nadeau, J. A. and Sack, F. D.** (2002). Control of stomatal distribution on the Arabidopsis leaf  
639 surface. *Science* **296**, 1697-1700.
- 640 **Nusslein-Volhard, C.** (2012). The zebrafish issue of Development. *Development* **139**, 4099-4103.
- 641 **Peebles, P. J. E.** (1974). The Nature of the Distribution of Galaxies. *Astronomy and Astrophysics*  
642 **32**, 197.
- 643 **Pillitteri, L. J. and Torii, K. U.** (2012). Mechanisms of stomatal development. *Annu Rev Plant Biol*  
644 **63**, 591-614.
- 645 **Qi, X., Han, S. K., Dang, J. H., Garrick, J. M., Ito, M., Hofstetter, A. K. and Torii, K. U.** (2017).  
646 Autocrine regulation of stomatal differentiation potential by EPF1 and ERECTA-LIKE1 ligand-  
647 receptor signaling. *Elife* **6**. e24102



- 648 **Qi, X. and Torii, K. U.** (2018). Hormonal and environmental signals guiding stomatal development.  
649 *BMC Biol* **16**, 21.
- 650 **Ripley, B. D.** (1976). The second-order analysis of stationary point processes. *Journal of Applied*  
651 *Probability* **13**, 255-266.
- 652 **Serna, L. and Fenoll, C.** (1996). Ethylene induces stomata differentiation in Arabidopsis. *Int J Dev*  
653 *Biol Suppl* **1**, 123S-124S.
- 654 **Shpak, E. D., McAbee, J. M., Pillitteri, L. J. and Torii, K. U.** (2005). Stomatal patterning and  
655 differentiation by synergistic interactions of receptor kinases. *Science* **309**, 290-293.
- 656 **Sugano, S. S., Shimada, T., Imai, Y., Okawa, K., Tamai, A., Mori, M. and Hara-Nishimura, I.**  
657 (2010). Stomagen positively regulates stomatal density in Arabidopsis. *Nature* **463**, 241-244.
- 658 **Tameshige, T., Okamoto, S., Lee, J. S., Aida, M., Tasaka, M., Torii, K. U. and Uchida, N.** (2016).  
659 A Secreted Peptide and Its Receptors Shape the Auxin Response Pattern and Leaf Margin  
660 Morphogenesis. *Curr Biol* **26**, 2478-2485.
- 661 **Tanaka, Y., Nose, T., Jikumaru, Y. and Kamiya, Y.** (2013). ABA inhibits entry into stomatal-lineage  
662 development in Arabidopsis leaves. *Plant J* **74**, 448-457.
- 663 **Torii, K. U.** (2012a). Mix-and-match: ligand-receptor pairs in stomatal development and beyond.  
664 *Trends Plant Sci* **17**, 711-719.
- 665 ---- (2012b). Two-dimensional spatial patterning in developmental systems. *Trends Cell Biol* **22**, 438-  
666 446.
- 667 **Uchida, N., Lee, J. S., Horst, R. J., Lai, H. H., Kajita, R., Kakimoto, T., Tasaka, M. and Torii, K.**  
668 **U.** (2012). Regulation of inflorescence architecture by intertissue layer ligand-receptor  
669 communication between endodermis and phloem. *Proc Natl Acad Sci USA* **109**, 6337-6342.
- 670 **Zhang, J. Y., He, S. B., Li, L. and Yang, H. Q.** (2014). Auxin inhibits stomatal development through  
671 MONOPTEROS repression of a mobile peptide gene STOMAGEN in mesophyll. *Proc Natl*  
672 *Acad Sci U S A* **111**, E3015-3023.
- 673

674

675

## 676 **Figure Legend**

677

### 678 **Figure 1. Mosaic Sectors Overexpressing EPF Peptides Non-cell Autonomously Influence**

#### 679 **Stomatal Patterning**

680 (A) Schematic diagram of the experimental design to generate erGFP sectors by heat-shock

681 treatment (top); False-colored confocal microscopy image of an abaxial epidermis. Green, a

682 sector; Purple, cells immediately adjacent to the sector (1 cell away); Lilac, cells 2 cells away from

683 the sector

684 (B) Schematic diagram of heat-shock induced Cre-Lox recombination and induction of

685 endoplasmic-reticulum trapped GFP (erGFP) as well as secreted EPF peptides.

686 (C) Quantitative RT-PCR analysis of transcripts of *EPF1* (left) and *STOMAGEN* (right) from 7-day-  
687 old seedlings of non-transformed Col, control sector expressing erGFP only and sectors  
688 expressing *EPF1* or *STOMAGEN*. The transcripts are normalized against Actin (*ACT2*). Three  
689 biological replicates were performed, each with three technical replicates, and representative  
690 results are shown.

691 (D) Z-stacked, tile-scanned representative confocal microscopy images of 7-day-old cotyledons  
692 subjected to heat-shock treatment as described in (A). From left, non-transformed Col, transgenic  
693 lines expressing a control sector, *EPF1* overexpressing sector, and *STOMAGEN* overexpressing  
694 sector. Scale bars, 50  $\mu$ m. Above insets, Close-up images of each sector with stomata highlighted  
695 by white ovals. For tile scan of the entire cotyledons, see Fig. S1.

696 (E-G) Relative frequency of stomata (number of stomata per total number of epidermal cells) within  
697 sectors (E; green), cells immediately adjacent to sectors (F; purple, "1 cell away"), and cells  
698 adjacent to immediate neighboring cells (G; lilac, "2 cells away"). For wild type, virtual sectors of  
699 the same size and geometry as real sectors were computationally placed. Total numbers of  
700 stomata and epidermal cells were aggregated to generate a single dataset for each genotype to  
701 enable robust statistical testing. Number of sectors subjected to analysis; Number of sectors  
702 subjected to analysis; n=20 (virtual), n=34 (Control), n=25 (*EPF1*), n=31 (*Stomagen*). Total number  
703 of stomata and non-stomatal epidermal cells counted in sectors; n=229 (virtual), n=364 (Control),  
704 n=228 (*EPF1*), n=410 (*Stomagen*). Total number of stomata and non-stomatal epidermal cells  
705 counted adjacent to sectors; n=384 (virtual), n=564 (Control), n=358 (*EPF1*), n=817 (*Stomagen*).  
706 Total number of stomata and non-stomatal epidermal cells counted adjacent to immediate  
707 neighboring cells; n=702 (virtual), n=952 (Control), n=633 (*EPF1*), n=1398 (*Stomagen*). A  $\chi$ -square  
708 analysis was performed to test significant deviation between the frequencies of two aggregated  
709 samples. \*\*, p<0.05; \*\*\*, p<0.005; \*\*\*\*, p<0.0005.

710

711 **Figure 2. Mesophyll Sectors Overexpressing EPF-family Peptides Locally Influence**

712 **Stomatal Patterning**

713 (A) Example of Cre-Lox generated mesophyll sector shown as orthogonal slices. Right, close-up of  
714 a sector. Dotted line, an inner boundary of epidermal layer.

715 (B) Z-stacked, tile-scanned representative confocal microscopy images of 7-day-old cotyledons

716 with mesophyll sectors. From left, transgenic lines expressing a control sector, EPF1

717 overexpressing sector, and STOMSGEN overexpressing sector. Scale bars, 50  $\mu$ m. Above insets,

718 Close-up images of each sector with stomata highlighted by white ovals. For tile scan of the entire

719 cotyledons, see Fig. S2.

720 (C-D) Relative frequency of stomata (number of stomata per total number of epidermal cells)

721 immediately above the mesophyll sector (C; green) and cells immediately adjacent to the cells

722 above the mesophyll sectors (D; purple). Total numbers of stomata and epidermal cells were

723 aggregated to generate a single dataset for each genotype to enable robust statistical testing.

724 Number of sectors subjected to analysis; n=19 (Control), n=8 (EPF1), n=19 (Stomagen). Total

725 number of stomatal and non-stomatal epidermal cells subjected to analysis; n=295 (immediately

726 above the mesophyll sector); n=773 (adjacent to cells immediately above the mesophyll sector). A

727  $\chi$ -square analysis was performed to test significant deviation from the stomatal frequency of

728 control plants. \*\*, p<0.05; \*\*\*, p<0.005; \*\*\*\*, p<0.0005.

729

730 **Figure 3. Quantitative Analysis of Effective Range by Non-cell Autonomous Effects of EPF1**

731 **and Stomagen-overexpressing Sectors**

732 (A) Schematic diagram. The coordinate outline of a given sector (green) was enlarged to generate

733 a new coordinate boundary at a defined Range (red; in this case, 100  $\mu$ m) away from the sector

734 outline. The defined range maintains the geometry of the original sector. The stomatal density was

735 calculated in three regions: the interior of the original sector outline (green), the interior of the

736 expanded Range excluding the original sector (purple, but not green); and the rest of the cotyledon  
737 (white).

738 (B) Z-stacked, representative tile scan of a whole cotyledon with EPF1-ox sectors. Scale bar, 250  
739  $\mu\text{m}$ . For tile scans of other genotypes, see Figure S1.

740 (C) Representative 2-D coordinate mapping of the cotyledon boundary (magenta), the sector  
741 boundaries (green), the boundaries of expanded Ranges at 100  $\mu\text{m}$  (red) and 200  $\mu\text{m}$ , and  
742 stomata (blue). Note that if the expanded Range extends beyond the actual cotyledon boundaries,  
743 this extended area is excluded from analysis.

744 (D) Stomatal density inside of sectors for individual cotyledons: cotyledons with control sector(s)  
745 expressing erGFP only (gray; n=10); cotyledons with sector(s) overexpressing EPF1 (EPF1-  
746 ox)(teal; n=8); cotyledons with sector(s) overexpressing Stomagen (STOM-ox)(coral red; n=6).  
747 Total number of stomata counted in sectors, n=24 (control); n=5 (EPF1-ox); n=50 (STOM-ox). A  
748 Mann-Whitney U test was performed to test significant deviation between distributions of stomatal  
749 density.

750 (E) Stomatal density within 100  $\mu\text{m}$  Range of sectors for individual cotyledons: cotyledons  
751 analyzed are same as in (D). Total number of stomata counted within 100  $\mu\text{m}$  Range, n=116  
752 (control); n=52 (EPF1-ox); n=148 (STOM-ox). A Mann-Whitney U test was performed to test  
753 significant deviation between distributions of stomatal density.

754 (F) Stomatal density outside of the specified regions in (D) and (E) for individual cotyledons:  
755 cotyledons analyzed are same as in (D). Total number of stomata counted on the remaining area  
756 of cotyledons, n=2229 (control); n=1765 (EPF1-ox); n=1306 (STOM-ox). A Mann-Whitney U test  
757 was performed to test significant deviation between distributions of stomatal density.

758 (G) Data provided in (D-F), grouped by sector type and region of stomatal density. For each sector  
759 type, a Kruskal-Wallis (non-parametric ANOVA) test was performed to test significant deviation in  
760 stomatal density in sectors vs. 100  $\mu\text{m}$  Range vs. rest of cotyledon.

761

762 **Figure 4. Simulating 2-D Spatial Patterning with SPACE**

763 (A-C) Representative example of a uniformly random distribution and its statistical properties relative  
764 to a sector. Sample stomata were generated (A; black; n=500) relative to a sector (A; sector  
765 boundary highlighted in green). Stomata were generated according to the probability distribution in  
766 (C) and its stomata-sector correlation function in (B) was calculated directly from the generated  
767 points in (A) (see methods for calculation). The correlation function is close to zero both near and  
768 far from the sector, consistent with a uniformly random probability distribution. The X-axis 0 in (B, C)  
769 corresponds to a sector boundary (green).

770 (D-F) Representative example of a clustered distribution and its statistical properties relative to a  
771 sector. Sample stomata were generated (D; black; n=500) relative to a sector (D; sector boundary  
772 highlighted in green). Stomata were generated according to the probability distribution in (F) and its  
773 stomata-sector correlation function in (E) was calculated directly from the generated points in (D)  
774 (see methods for calculation). The correlation function is highly positive at close distances,  
775 consistent with strong clustering of stomata near the sector. The X-axis 0 in (D, E) corresponds to a  
776 sector boundary (green).

777 (G-I) Representative example of a uniformly-spaced distribution and its statistical properties relative  
778 to a sector. Sample stomata were generated (A; black; N=500) relative to a sector (A; sector  
779 boundary highlighted in green). Stomata were generated in rings around the sector, each a radius  
780 of 200 microns larger than the previous, corresponding to the probability distribution in (H). The  
781 stomata-sector correlation function in (I) was calculated directly from the generated points in (G)  
782 (see methods for calculation). As distance increases outward from the sector, the correlation function  
783 oscillates between positive and negative, corresponding to regions of stomata (positive) and empty  
784 space (negative). The X-axis 0 in (H, I) corresponds to a sector boundary (green).

785

786 **Figure 5 SPACE Analysis Determines the Effective Range of Signaling Peptides**

787 (A) Representative data for SPACE pipeline. (Top) Representative fully-tiled Z-stack confocal  
788 microscopy of entire cotyledons with sectors expressing vector only control (left), EPF1 (middle),  
789 and STOMAGEN (right). Scale bars, 250  $\mu\text{m}$ . (Middle) Plot of the tiled confocal images. XY-  
790 coordinates of cotyledon outlines (magenta), sector outlines (green), and all stomata on the entire  
791 cotyledon (blue) are registered. Number of stomata in each image:  $n=311$  (Control), 187 (EPF1),  
792 237 (Stomagen). (Bottom) One representative plot of the 100 plots of randomly-distributed virtual  
793 stomata (black dots) with the identical  $n$  to the actually observed stomata in the images above.

794 (B) Schematic diagram of SPACE analysis. Here, quantitative measurements were performed for  
795 the nearest distance between the edge of a sector (green) and every single stoma (magenta) as  
796 well as the nearest distance between the edge of a sector and every single random dot (randomly-  
797 placed virtual stoma) generated computationally (see panel A, middle). See methods for  
798 calculation.

799 (C) SPACE analysis plot. The autocorrelation of sector to stomata in the function of distance from  
800 the sector boundary. Control sector autocorrelation (gray) exhibits subtle peaks at proximity  $\sim 50$   
801  $\mu\text{m}$  and at  $\sim 150 \mu\text{m}$ , a latter of which may correspond to two stomata separated by one-cell  
802 spacing rule. The STOMAGEN-expressing sector (red) exhibits a strongly positive correlation at  
803 the sector boundary, which decays within the first  $\sim 60 \mu\text{m}$ . By contrast, EPF1-expressing sector  
804 (blue) exhibits a negative correlation that gradually decays at around  $\sim 160 \mu\text{m}$ . Colored area  
805 represents 95 % confidence range.

806

807





815 (B) Schematic diagram of heat-shock induced Cre-Lox recombination and induction of endoplasmic-  
816 reticulum trapped GFP (erGFP) as well as secreted EPF peptides.  
817 (C) Quantitative RT-PCR analysis of transcripts of *EPF1* (left) and *STOMAGEN* (right) from 7-day-old  
818 seedlings of non-transformed Col, control sector expressing erGFP only and sectors expressing *EPF1*  
819 or *STOMAGEN*. The transcripts are normalized against Actin (*ACT2*). Three biological replicates were  
820 performed, each with three technical replicates, and representative results are shown.  
821 (D) Z-stacked, tile-scanned representative confocal microscopy images of 7-day-old cotyledons  
822 subjected to heat-shock treatment as described in (A). From left, non-transformed Col, transgenic lines  
823 expressing a control sector, EPF1 overexpressing sector, and STOMAGEN overexpressing sector.  
824 Scale bars, 50  $\mu\text{m}$ . Above insets, Close-up images of each sector with stomata highlighted by white  
825 ovals. For tile scan of the entire cotyledons, see Fig. S1.  
826 (E-G) Relative frequency of stomata (number of stomata per total number of epidermal cells) within  
827 sectors (E; green), cells immediately adjacent to sectors (F; purple, "1 cell away"), and cells adjacent to  
828 immediate neighboring cells (G; lilac, "2 cells away"). For wild type, virtual sectors of the same size and  
829 geometry as real sectors were computationally placed. Total numbers of stomata and epidermal cells  
830 were aggregated to generate a single dataset for each genotype to enable robust statistical testing.  
831 Number of sectors subjected to analysis; Number of sectors subjected to analysis; n=20 (virtual), n=34  
832 (Control), n=25 (EPF1), n=31 (Stomagen). Total number of stomata and non-stomatal epidermal cells  
833 counted in sectors; n=229 (virtual), n=364 (Control), n=228 (EPF1), n=410 (Stomagen). Total number  
834 of stomata and non-stomatal epidermal cells counted adjacent to sectors; n=384 (virtual), n=564  
835 (Control), n=358 (EPF1), n=817 (Stomagen). Total number of stomata and non-stomatal epidermal  
836 cells counted adjacent to immediate neighboring cells; n=702 (virtual), n=952 (Control), n=633 (EPF1),  
837 n=1398 (Stomagen). A  $\chi$ -square analysis was performed to test significant deviation between the  
838 frequencies of two aggregated samples. \*\*, p<0.05; \*\*\*, p<0.005; \*\*\*\*, p<0.0005.  
839  
840



841

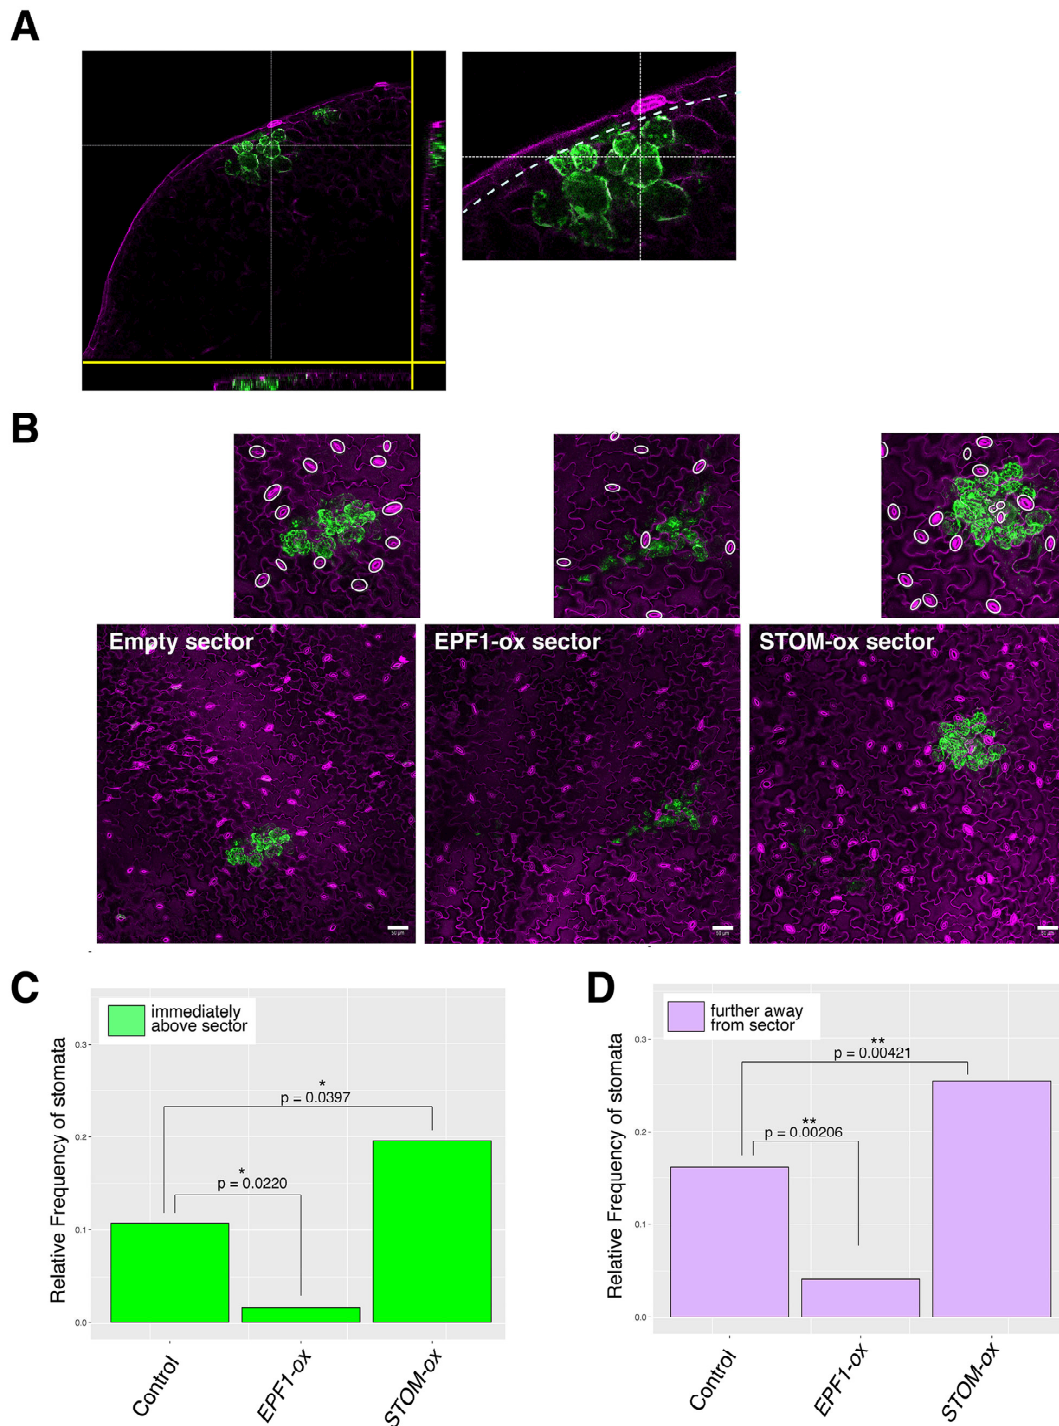

842

843

844 **Figure 2. Mesophyll Sectors Overexpressing EPF-family Peptides Locally Influence Stomatal**  
845 **Patterning**

846 (A) Example of Cre-Lx generated mesophyll sector shown as orthogonal slices. Right, close-up of a  
847 sector. Dotted line, an inner boundary of epidermal layer.

848 (B) Z-stacked, tile-scanned representative confocal microscopy images of 7-day-old cotyledons with  
849 mesophyll sectors. From left, transgenic lines expressing a control sector, EPF1 overexpressing sector,

850 and STOMSGEN overexpressing sector. Scale bars, 50  $\mu\text{m}$ . Above insets, Close-up images of each  
851 sector with stomata highlighted by white ovals. For tile scan of the entire cotyledons, see Fig. S2.  
852 (C-D) Relative frequency of stomata (number of stomata per total number of epidermal cells)  
853 immediately above the mesophyll sector (C; green) and cells immediately adjacent to the cells above  
854 the mesophyll sectors (D; purple). Total numbers of stomata and epidermal cells were aggregated to  
855 generate a single dataset for each genotype to enable robust statistical testing. Number of sectors  
856 subjected to analysis; n=19 (Control), n=8 (EPF1), n=19 (Stomagen). Total number of stomatal and  
857 non-stomatal epidermal cells subjected to analysis; n=295 (immediately above the mesophyll sector);  
858 n=773 (adjacent to cells immediately above the mesophyll sector). A  $\chi$ -square analysis was performed  
859 to test significant deviation from the stomatal frequency of control plants. \*\*, p<0.05; \*\*\*, p<0.005; \*\*\*\*,  
860 p<0.0005.  
861  
862  
863

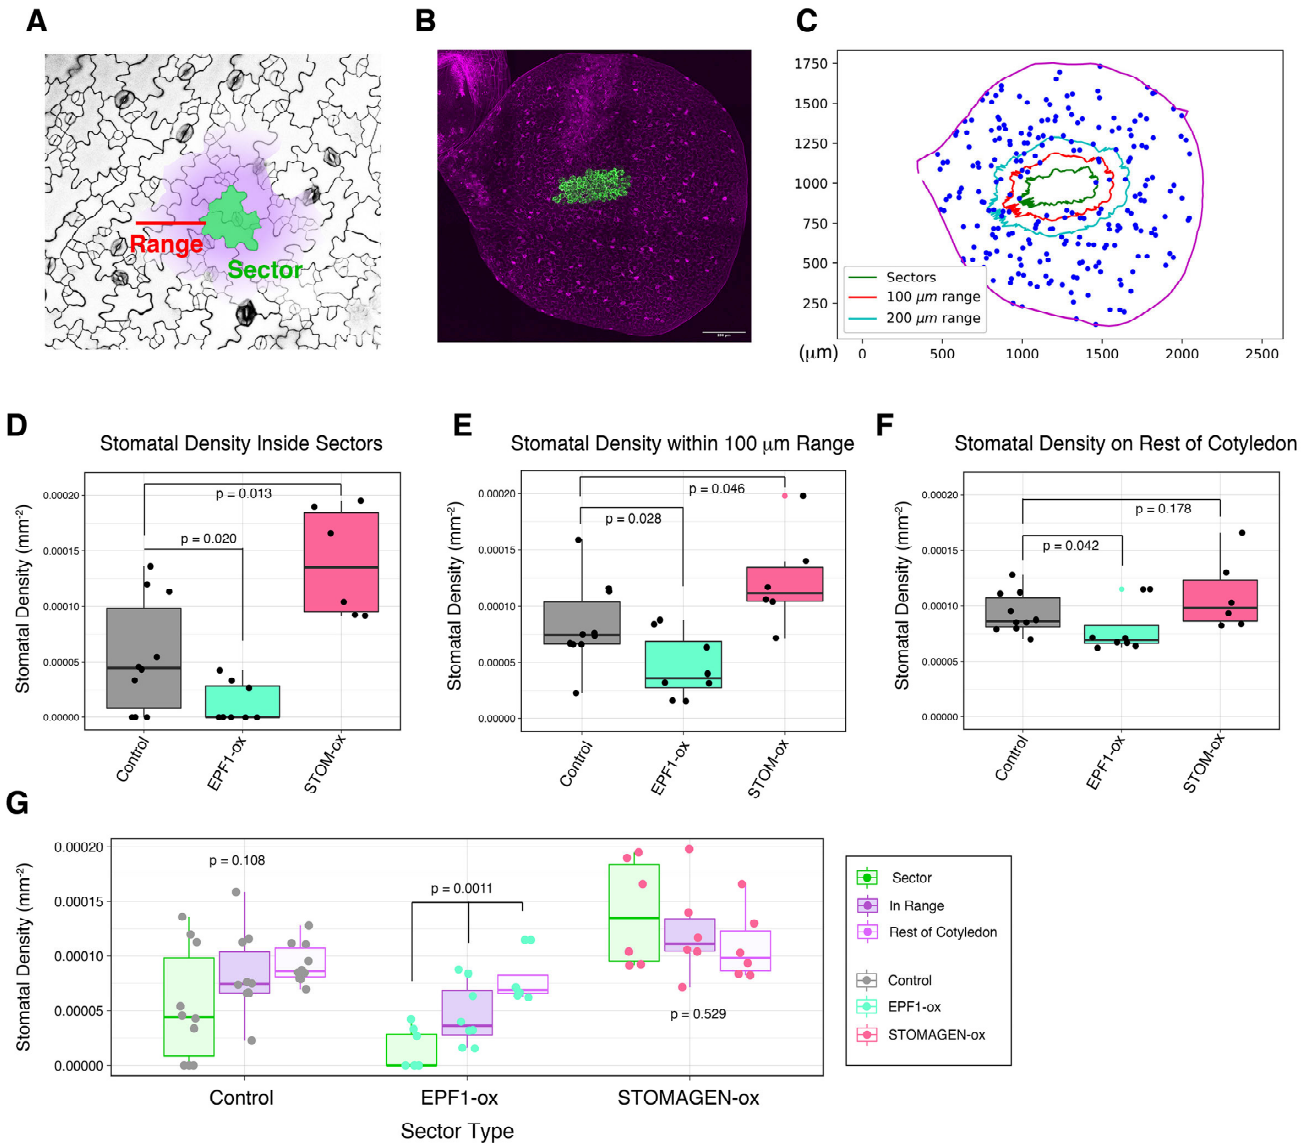

864  
865  
866 **Figure 3. Quantitative Analysis of Effective Range by Non-cell Autonomous Effects of EPF1 and**  
867 **Stomagen-overexpressing Sectors**  
868 (A) Schematic diagram. The coordinate outline of a given sector (green) was enlarged to generate a  
869 new coordinate boundary at a defined Range (red; in this case, 100 μm) away from the sector outline.  
870 The defined range maintains the geometry of the original sector. The stomatal density was calculated in  
871 three regions: the interior of the original sector outline (green), the interior of the expanded Range  
872 excluding the original sector (purple, but not green); and the rest of the cotyledon (white).  
873 (B) Z-stacked, representative tile scan of a whole cotyledon with EPF1-ox sectors. Scale bar, 250 μm.  
874 For tile scans of other genotypes, see Figure S1.  
875 (C) Representative 2-D coordinate mapping of the cotyledon boundary (magenta), the sector  
876 boundaries (green), the boundaries of expanded Ranges at 100 μm (red) and 200 μm, and stomata  
877 (blue). Note that if the expanded Range extends beyond the actual cotyledon boundaries, this extended  
878 area is excluded from analysis.  
879 (D) Stomatal density inside of sectors for individual cotyledons: cotyledons with control sector(s)  
880 expressing erGFP only (gray; n=10); cotyledons with sector(s) overexpressing EPF1 (EPF1-ox)(teal;

881 n=8); cotyledons with sector(s) overexpressing Stomagen (STOM-ox)(coral red; n=6). Total number of  
882 stomata counted in sectors, n=24 (control); n=5 (EPF1-ox); n=50 (STOM-ox). A Mann-Whitney U test  
883 was performed to test significant deviation between distributions of stomatal density.  
884 (E) Stomatal density within 100  $\mu$ m Range of sectors for individual cotyledons: cotyledons analyzed are  
885 same as in (D). Total number of stomata counted within 100  $\mu$ m Range, n=116 (control); n=52 (EPF1-  
886 ox); n=148 (STOM-ox). A Mann-Whitney U test was performed to test significant deviation between  
887 distributions of stomatal density.  
888 (F) Stomatal density outside of the specified regions in (D) and (E) for individual cotyledons: cotyledons  
889 analyzed are same as in (D). Total number of stomata counted on the remaining area of cotyledons,  
890 n=2229 (control); n=1765 (EPF1-ox); n=1306 (STOM-ox). A Mann-Whitney U test was performed to  
891 test significant deviation between distributions of stomatal density.  
892 (G) Data provided in (D-F), grouped by sector type and region of stomatal density. For each sector  
893 type, a Kruskal-Wallis (non-parametric ANOVA) test was performed to test significant deviation in  
894 stomatal density in sectors vs. 100  $\mu$ m Range vs. rest of cotyledon.  
895  
896  
897

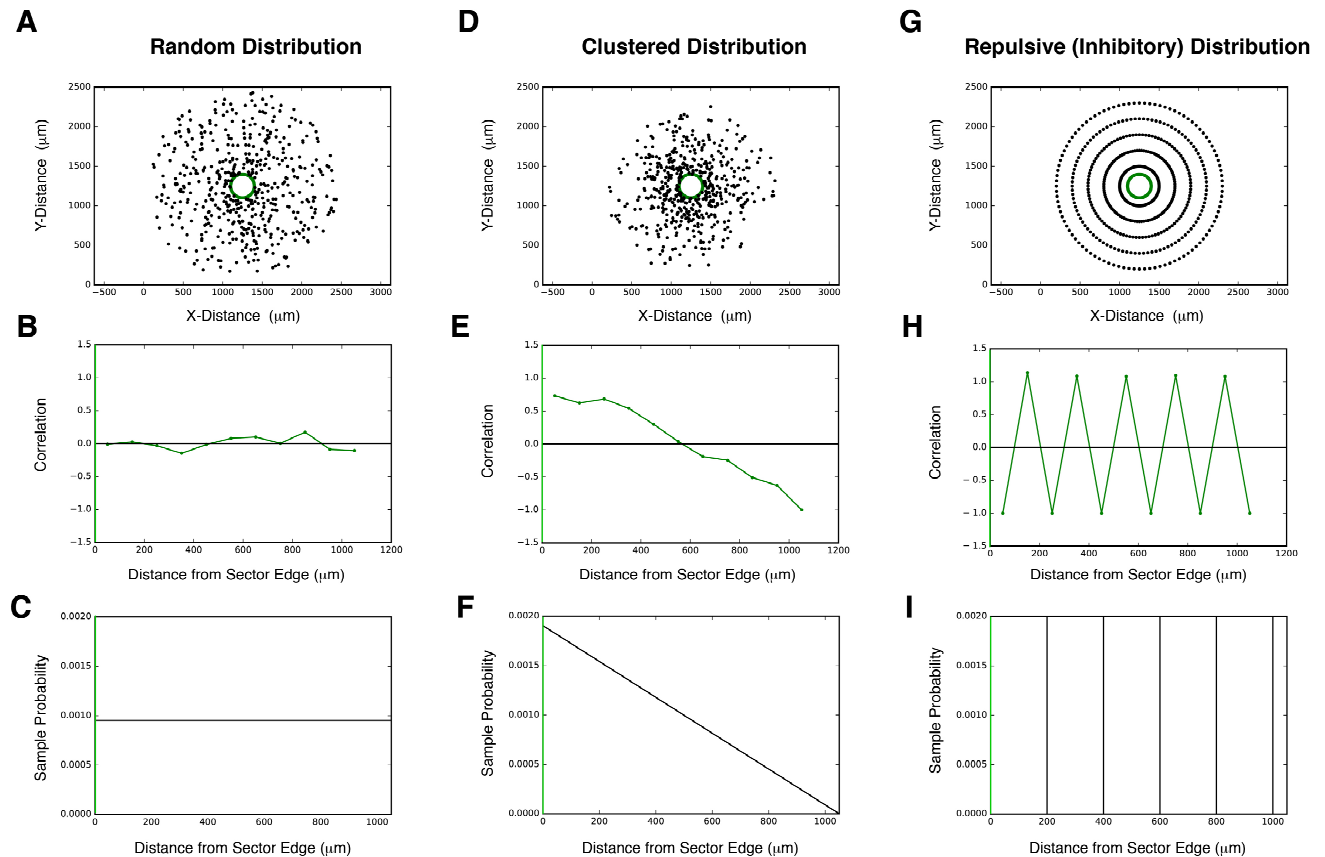

898  
899  
900  
901  
902  
903  
904  
905  
906  
907  
908  
909  
910  
911  
912  
913  
914  
915  
916  
917  
918  
919  
920  
921  
922  
923

#### Figure 4. Simulating 2-D Spatial Patterning of Stomata with SPACE

(A-C) Representative example of a uniformly random distribution and its statistical properties relative to a sector. Sample stomata were generated (A; black;  $n=500$ ) relative to a sector (A; sector boundary highlighted in green). Stomata were generated according to the probability distribution in (C) and its stomata-sector correlation function in (B) was calculated directly from the generated points in (A) (see methods for calculation). The correlation function is close to zero both near and far from the sector, consistent with a uniformly random probability distribution. The X-axis 0 in (B, C) corresponds to a sector boundary (green).

(D-F) Representative example of a clustered distribution and its statistical properties relative to a sector. Sample stomata were generated (D; black;  $n=500$ ) relative to a sector (D; sector boundary highlighted in green). Stomata were generated according to the probability distribution in (F) and its stomata-sector correlation function in (E) was calculated directly from the generated points in (D) (see methods for calculation). The correlation function is highly positive at close distances, consistent with strong clustering of stomata near the sector. The X-axis 0 in (D, E) corresponds to a sector boundary (green).

(G-I) Representative example of a uniformly-spaced distribution and its statistical properties relative to a sector. Sample stomata were generated (A; black;  $N=500$ ) relative to a sector (A; sector boundary highlighted in green). Stomata were generated in rings around the sector, each a radius of 200 microns larger than the previous, corresponding to the probability distribution in (H). The stomata-sector correlation function in (I) was calculated directly from the generated points in (G) (see methods for calculation). As distance increases outward from the sector, the correlation function oscillates between positive and negative, corresponding to regions of stomata (positive) and empty space (negative). The X-axis 0 in (H, I) corresponds to a sector boundary (green).



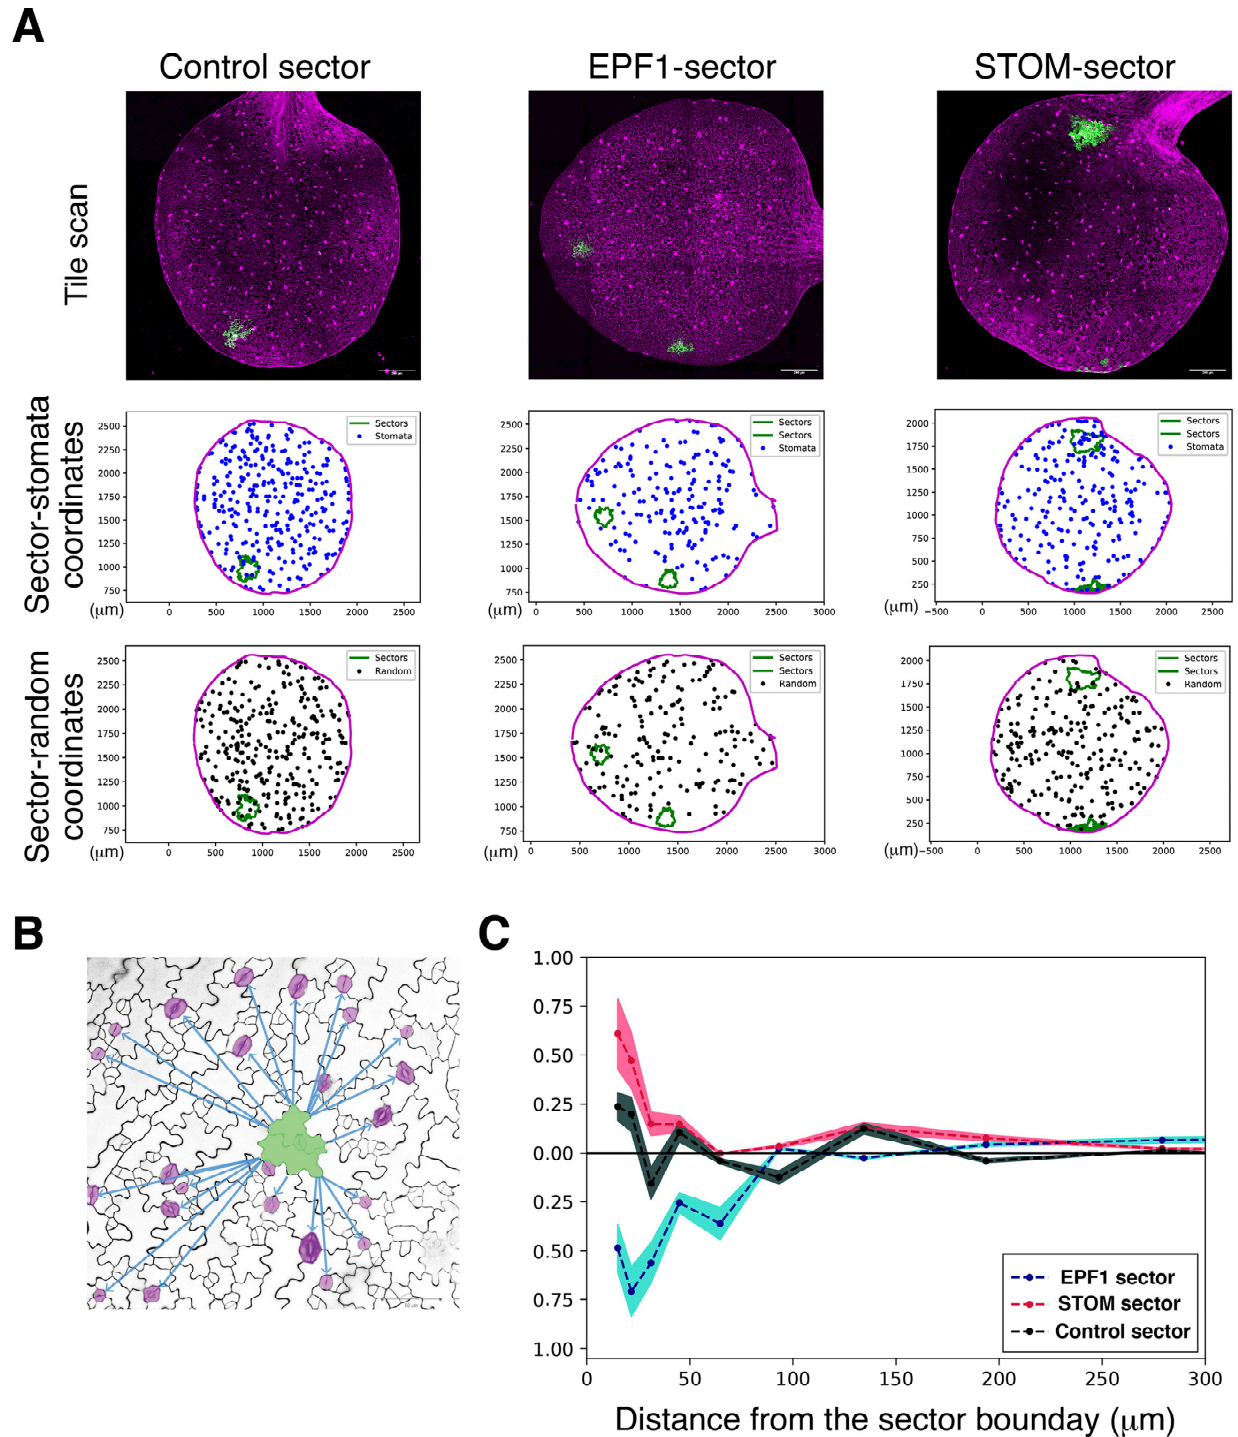

924  
925  
926  
927  
928  
929  
930  
931

**Figure 5 SPACE Analysis Determines the Effective Range of Signaling Peptides**

(A) Representative data for SPACE pipeline. (Top) Representative fully-tiled Z-stack confocal microscopy of entire cotyledons with sectors expressing vector only control (left), EPF1 (middle), and STOMAGEN (right). Scale bars, 250  $\mu\text{m}$ . (Middle) Plot of the tiled confocal images. XY-coordinates of cotyledon outlines (magenta), sector outlines (green), and all stomata on the entire cotyledon (blue) are registered. Number of stomata in each image:  $n = 311$  (Control), 187 (EPF1), 237 (Stomagen). (Bottom)

932 One representative plot of the 100 plots of randomly-distributed virtual stomata (black dots) with the  
933 identical  $n$  to the actually observed stomata in the images above.  
934 (B) Schematic diagram of SPACE analysis. Here, quantitative measurements were performed for the  
935 nearest distance between the edge of a sector (green) and every single stoma (magenta) as well as the  
936 nearest distance between the edge of a sector and every single random dot (randomly-placed virtual  
937 stoma) generated computationally (see panel A, middle). See methods for calculation.  
938 (C) SPACE analysis plot. The autocorrelation of sector to stomata in the function of distance from the  
939 sector boundary. Control sector autocorrelation (gray) exhibits subtle peaks at proximity  $\sim 50 \mu\text{m}$  and at  
940  $\sim 150 \mu\text{m}$ , a latter of which may correspond to two stomata separated by one-cell spacing rule. The  
941 STOMAGEN-expressing sector (red) exhibits a strongly positive correlation at the sector boundary,  
942 which decays within the first  $\sim 60 \mu\text{m}$ . By contrast, EPF1-expressing sector (blue) exhibits a negative  
943 correlation that gradually decays at around  $\sim 160 \mu\text{m}$ . Colored area represents 95 % confidence range.  
944
